# Supplementary material for: Electrochemical behavior and biocompatibility of TiO2@C core–shell NWs deposited by PECVD for cellular interface application
Source: Royal Society of Chemistry journal article supplement (doi:10.1039/d5ra05460e), 2025-01-01
Supplement: d5ra05460e1.pdf [file d5ra05460e1.pdf]

## **Electrochemical behavior and biocompatibility of TiO<sub>2</sub>@C core-shell NWs deposited by PECVD for cellular interface application.**

Roaa Sait<sup>1</sup>, Raghad Alzahrani<sup>1</sup>, Nabeel Aslam<sup>2</sup>, Shofarul Wustoni<sup>3</sup>, Camelia Florica<sup>2</sup>, Andrea Diaz-Gaxiola<sup>4</sup>, Georgian Melinte<sup>2</sup>, Yaping Zhang<sup>2</sup>, Youyou Yuan<sup>2</sup>, Mohammed Nejib Hedhili<sup>2</sup>, Sridhar Govindarajan<sup>5</sup>, Ahad Syed<sup>2</sup>, Imed Eddine-Gallouzi<sup>4</sup>, Sahika Inal<sup>3</sup>, Hala Aljawhari<sup>1</sup>

<sup>1</sup> *Faculty of Science, Department of Physics, King Abdulaziz University, Jeddah 21589, Saudi Arabia.*

<sup>2</sup> *Core Laboratories, King Abdullah University of Science and Engineering, Thuwal 23955-6900, Saudi Arabia.*

<sup>3</sup> *Organic Bioelectronics Laboratory, Biological Science and Engineering Division, King Abdullah University of Science and Engineering (KAUST), Thuwal 23955-6900, Saudi Arabia.*

<sup>4</sup> *Bioscience laboratory, Biological and Environmental Sciences and Engineering, King Abdullah University of Science and Engineering (KAUST), Thuwal 23955-6900, Saudi Arabia.*

<sup>5</sup> *Emerging Technologies Research Center, De Montfort University, The Gateway, Leicester, LE18BH, United Kingdom.*

*Corresponding author email: [sait.roaa@gmail.com](mailto:sait.roaa@gmail.com). Tel: +966 12 263-289.*

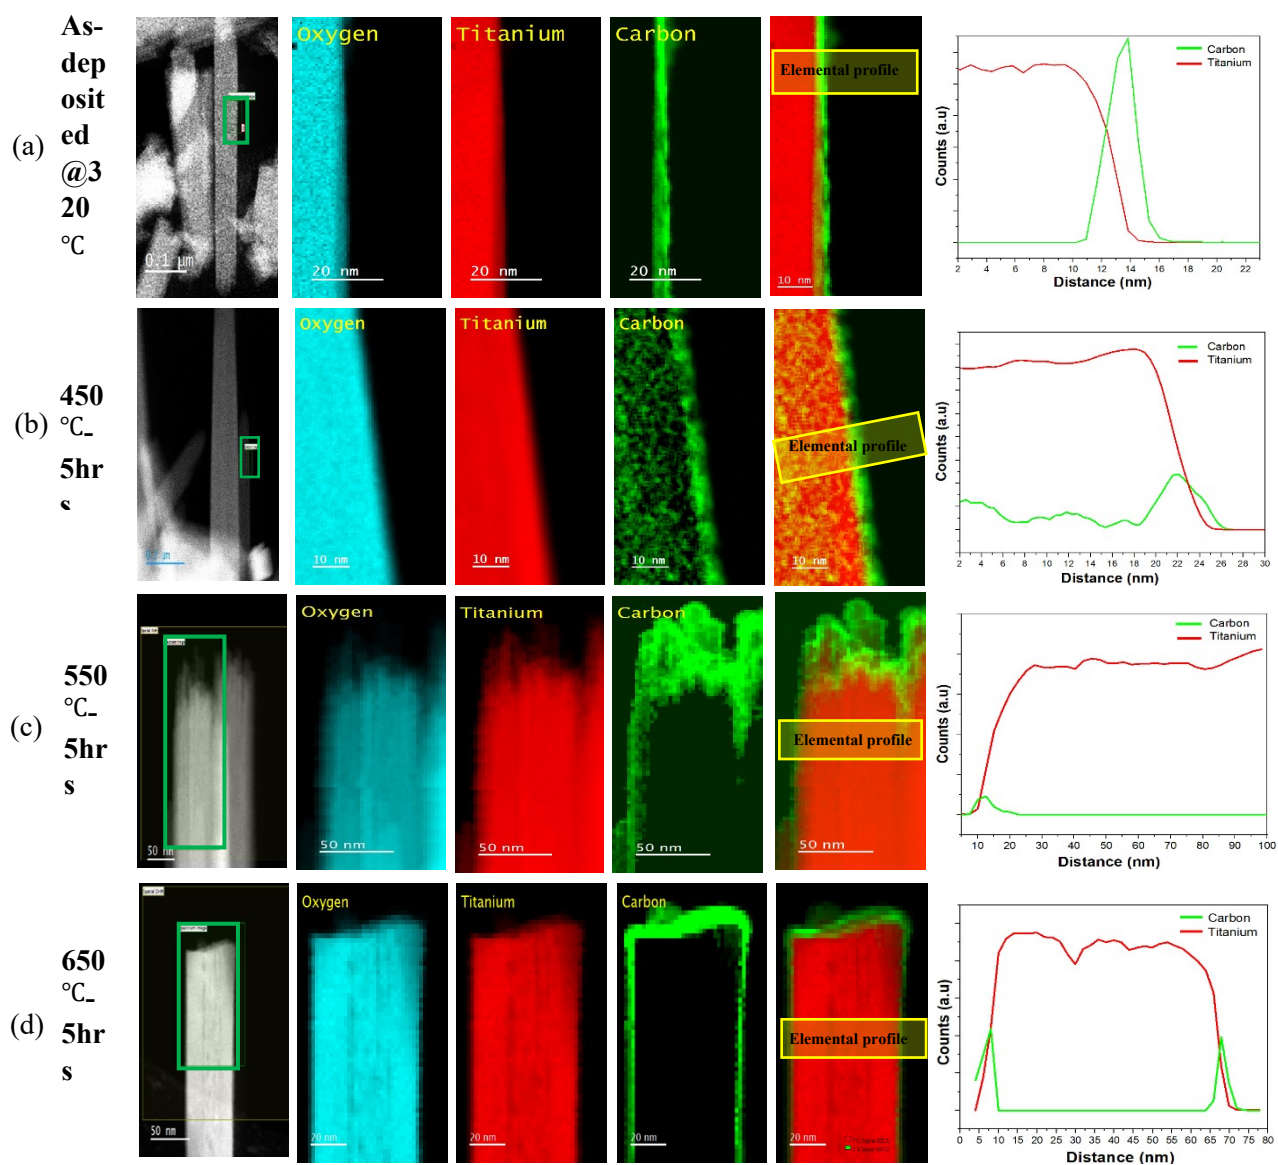

**Figure S1: STEM image and EELS elemental maps of  $\text{TiO}_2@\text{C}$  core-shell NWS for (a) as-deposited carbon, (b) in-situ annealed at 450 °C for 5 hours, (c) 550 °C for 5 hours, and (d) 650 °C for 5 hours, with their Elemental profile of C and Ti showing the shell thickness.**

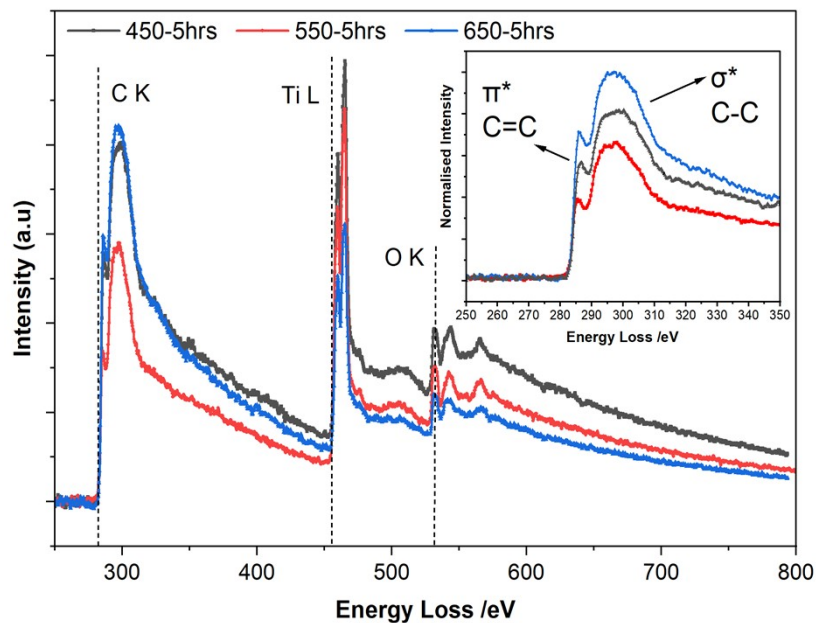

*Figure S2: Top region overall EELS spectra of  $\text{TiO}_2@\text{C}$  core-shell NWS annealed at 450 °C, 550 °C, and 650 °C with an inset figure showing the high-resolution C K-edge.*

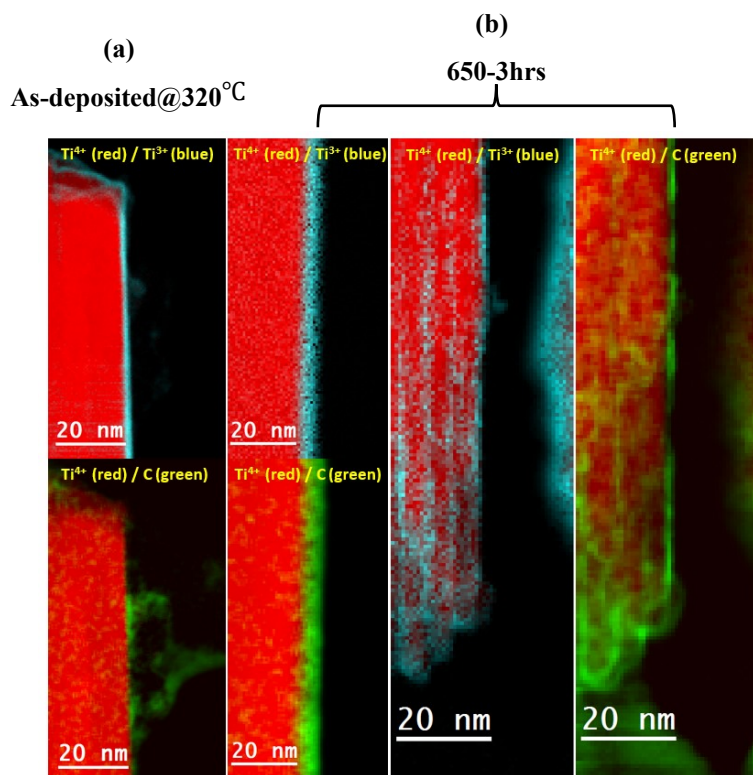

*Figure S3: EELS elemental maps of  $\text{TiO}_2@\text{C}$  core-shell NWS for (a) as-deposited carbon, (b) in-situ annealed at 650 °C for 3 hours.*

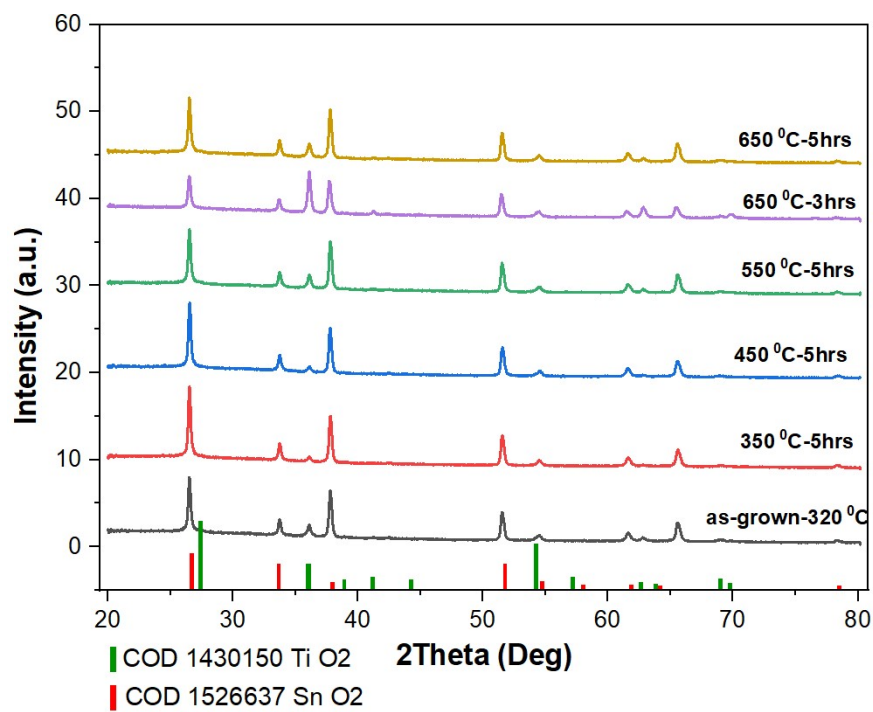

Figure S4: XRD of TiO<sub>2</sub>@C core-shell NWS annealed at different temperatures and times.

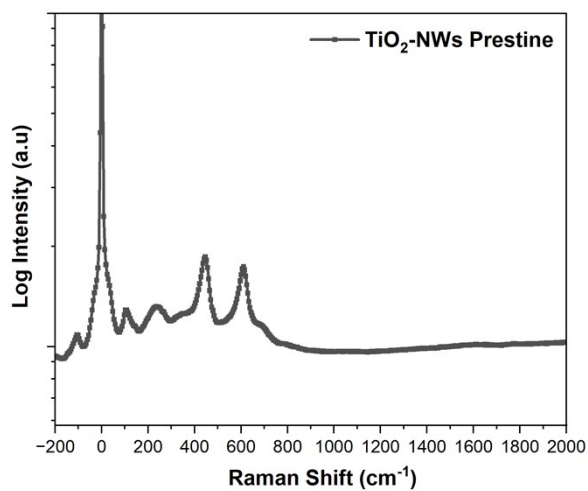

Figure S5: Raman Spectroscopy spectrum of pristine TiO<sub>2</sub>-NWs.

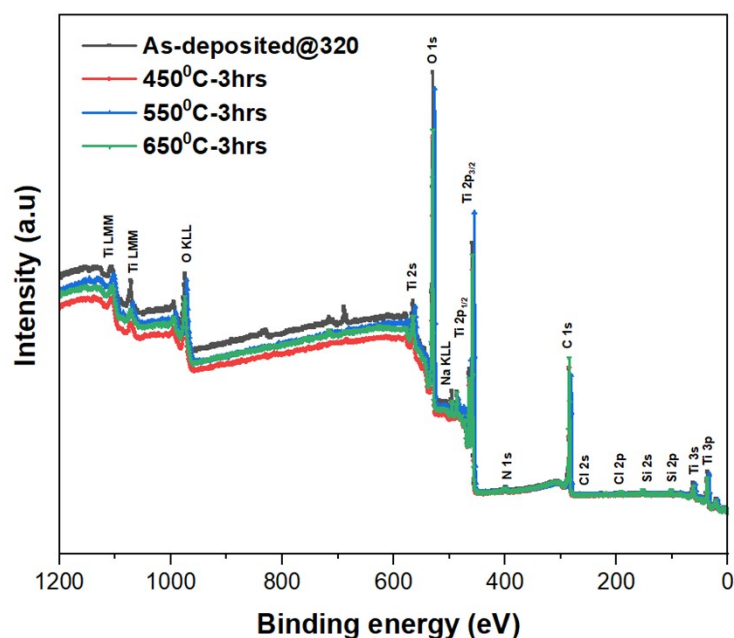

Figure S6: XPS survey spectra of TiO<sub>2</sub>@C core-shell NWS in-situ annealed at 450 °C, 550 °C, and 650 °C for 3 hours, showing dominants binding energy peaks corresponding to Ti, C and O signals.

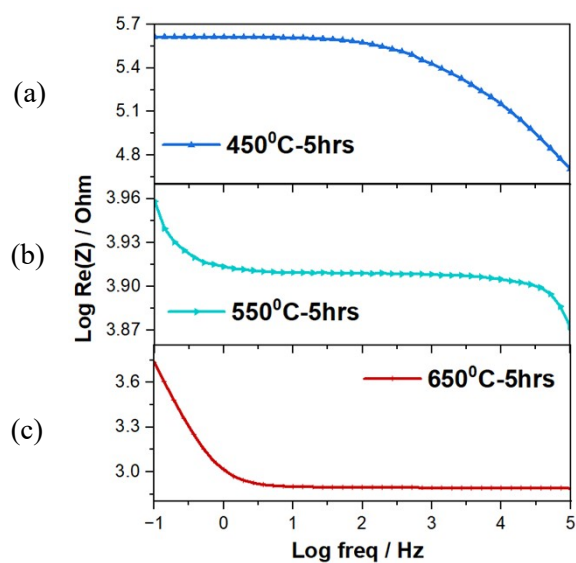

Figure S7: Bode plots of TiO<sub>2</sub>@C-NWs samples in-situ annealed at (a) 450 °C for 5 hours, (b) 550 °C for 5 hours, and (c) 650 °C for 5 hours.



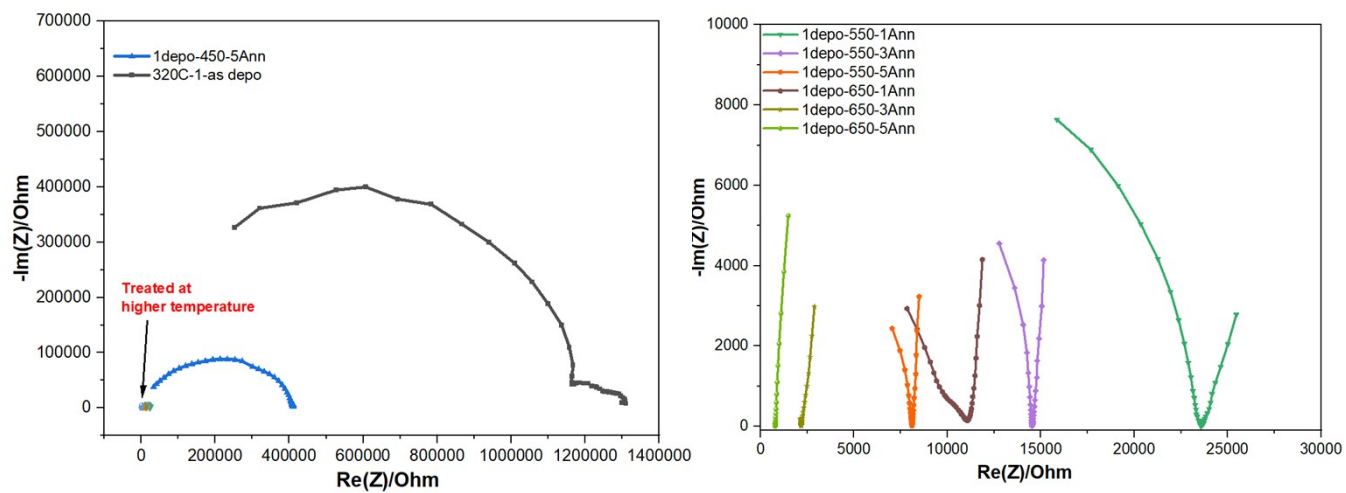

**Figure S8: Nyquist impedance spectra of (a) as-deposited  $\text{TiO}_2@\text{C-NWs}$  sample and in-situ annealed at  $450^\circ\text{C}$  for 5 hours, and (b) samples annealed at  $550^\circ\text{C}$  and  $650^\circ\text{C}$  for 1, 3, 5 hours.**
